# Supplementary material
Source: PubMed Central journal article supplement (PMC9886915)
Supplement: 41467_2023_36123_MOESM1_ESM.pdf [file 41467_2023_36123_MOESM1_ESM.pdf]

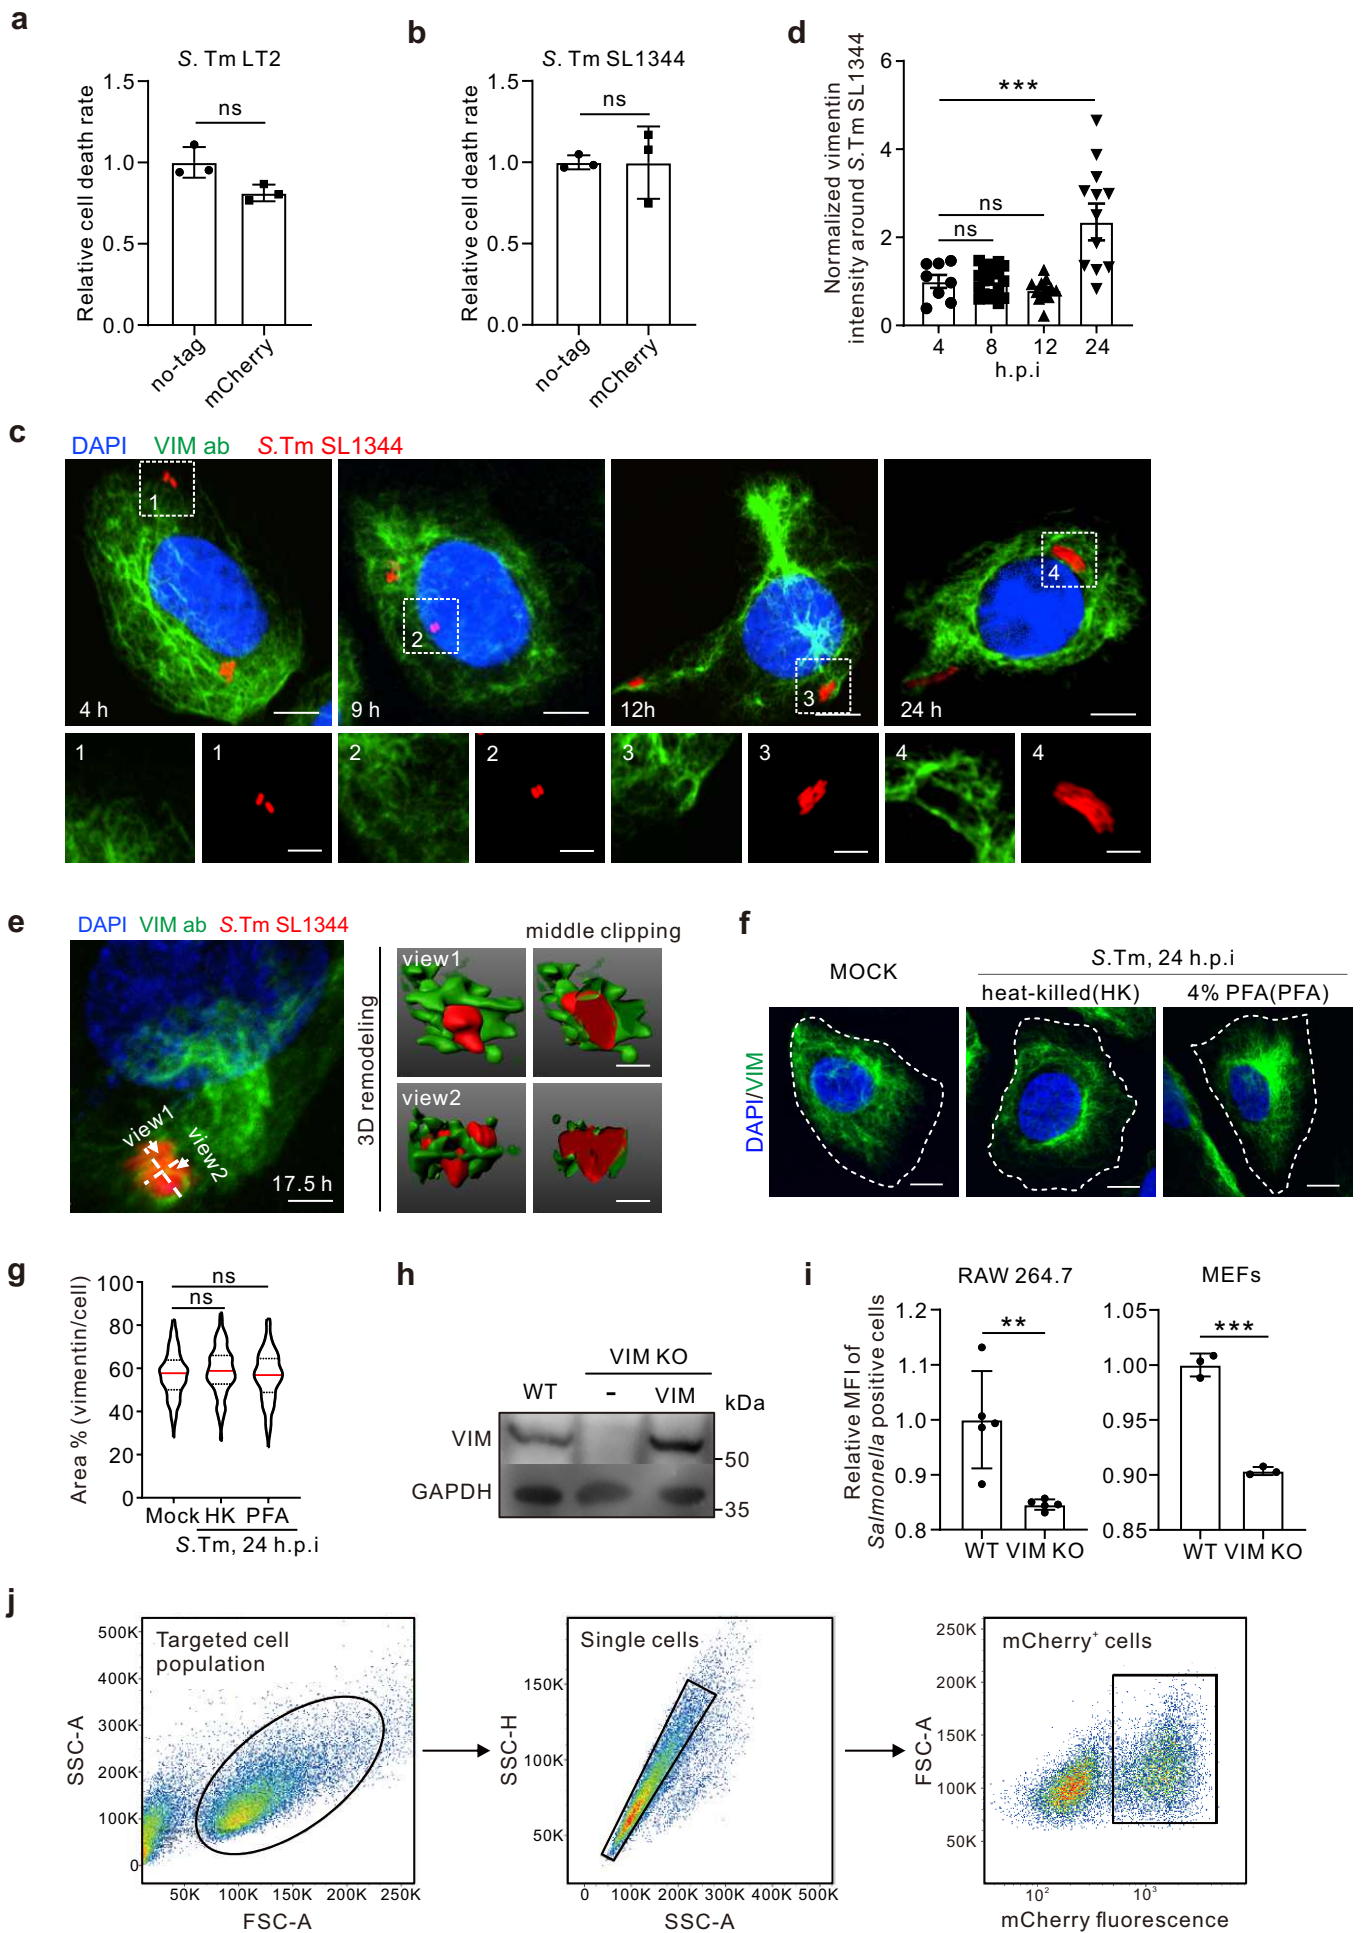

**Supplementary Figure 1. Cellular vimentin was rearranged upon different *Salmonella* strains infection, and vimentin is critical for *Salmonella* survival in different cell lines.** **a,b**, Quantification of the normalized cell death rate in cells infected with the non-tagged and mCherry-tagged *S. Tm* (strain LT2; MOI=10) at 24 *hpi* (**a**) and non-tagged and mCherry-tagged *S. Tm* (strain SL1344; MOI=10) at 24 *hpi* (**b**), respectively, from three independent experiments. **c**, Immunofluorescence images of cells infected with the *S. Tm* (strain SL1344; MOI=10). Scale bars, 10  $\mu\text{m}$  in the cell images and 2  $\mu\text{m}$  in the magnified images. **d**, Quantification of the normalized vimentin-GFP intensity around *S. Tm* cluster (strain SL1344) in (**c**) was measured from three independent experiments. **e**, Representative image and the cross-section showing the cage-like structure of vimentin around *S. Tm* (strain SL1344; MOI=10) at 24 *hpi*. Scale bars, 10  $\mu\text{m}$  in the cell image and 2  $\mu\text{m}$  in the magnified images. Analysis was conducted three times independently with similar results. **f**, Immunofluorescence images of cells infected with the heat-killed (65°C for 10min) or 4% PFA (30min) treated *S. Tm* (strain LT2; MOI=10). White dash lines indicate the outline of the cells. Scale bars, 10  $\mu\text{m}$ . **g**, Quantification of the relative vimentin area versus cell area in (**f**) were measured. n=20 views (60 $\times$ /1.5 oil objective) from three independent experiments. **h**, Western blotting analysis to detect vimentin in WT, VIM KO and VIM-FL rescue U2OS cells. GAPDH serves as a loading control. **i**, Quantification of relative MFI values by FACS in WT and VIM KO RAW 264.7 or MEFs infected with mCherry-tagged *S. Tm* (MOI=50) at 24 *hpi*, respectively, from three independent experiments. **j**, Representative flow cytometric panels. The cells were gated to exclude debris and doublets. Mcherry-tagged bacteria infected cells were identified as mCherry<sup>+</sup> cells. Data are represented as mean  $\pm$  SD. Statistics (ns,  $p > 0.05$ ; \*\* $p < 0.01$ ; \*\*\* $p < 0.001$ ): unpaired two-tailed Student's *t*-test (**a**, **b**, **i**) or one-way ANOVA with Dunnett's analysis (**d**, **g**). Source data are provided as a Source Data file.

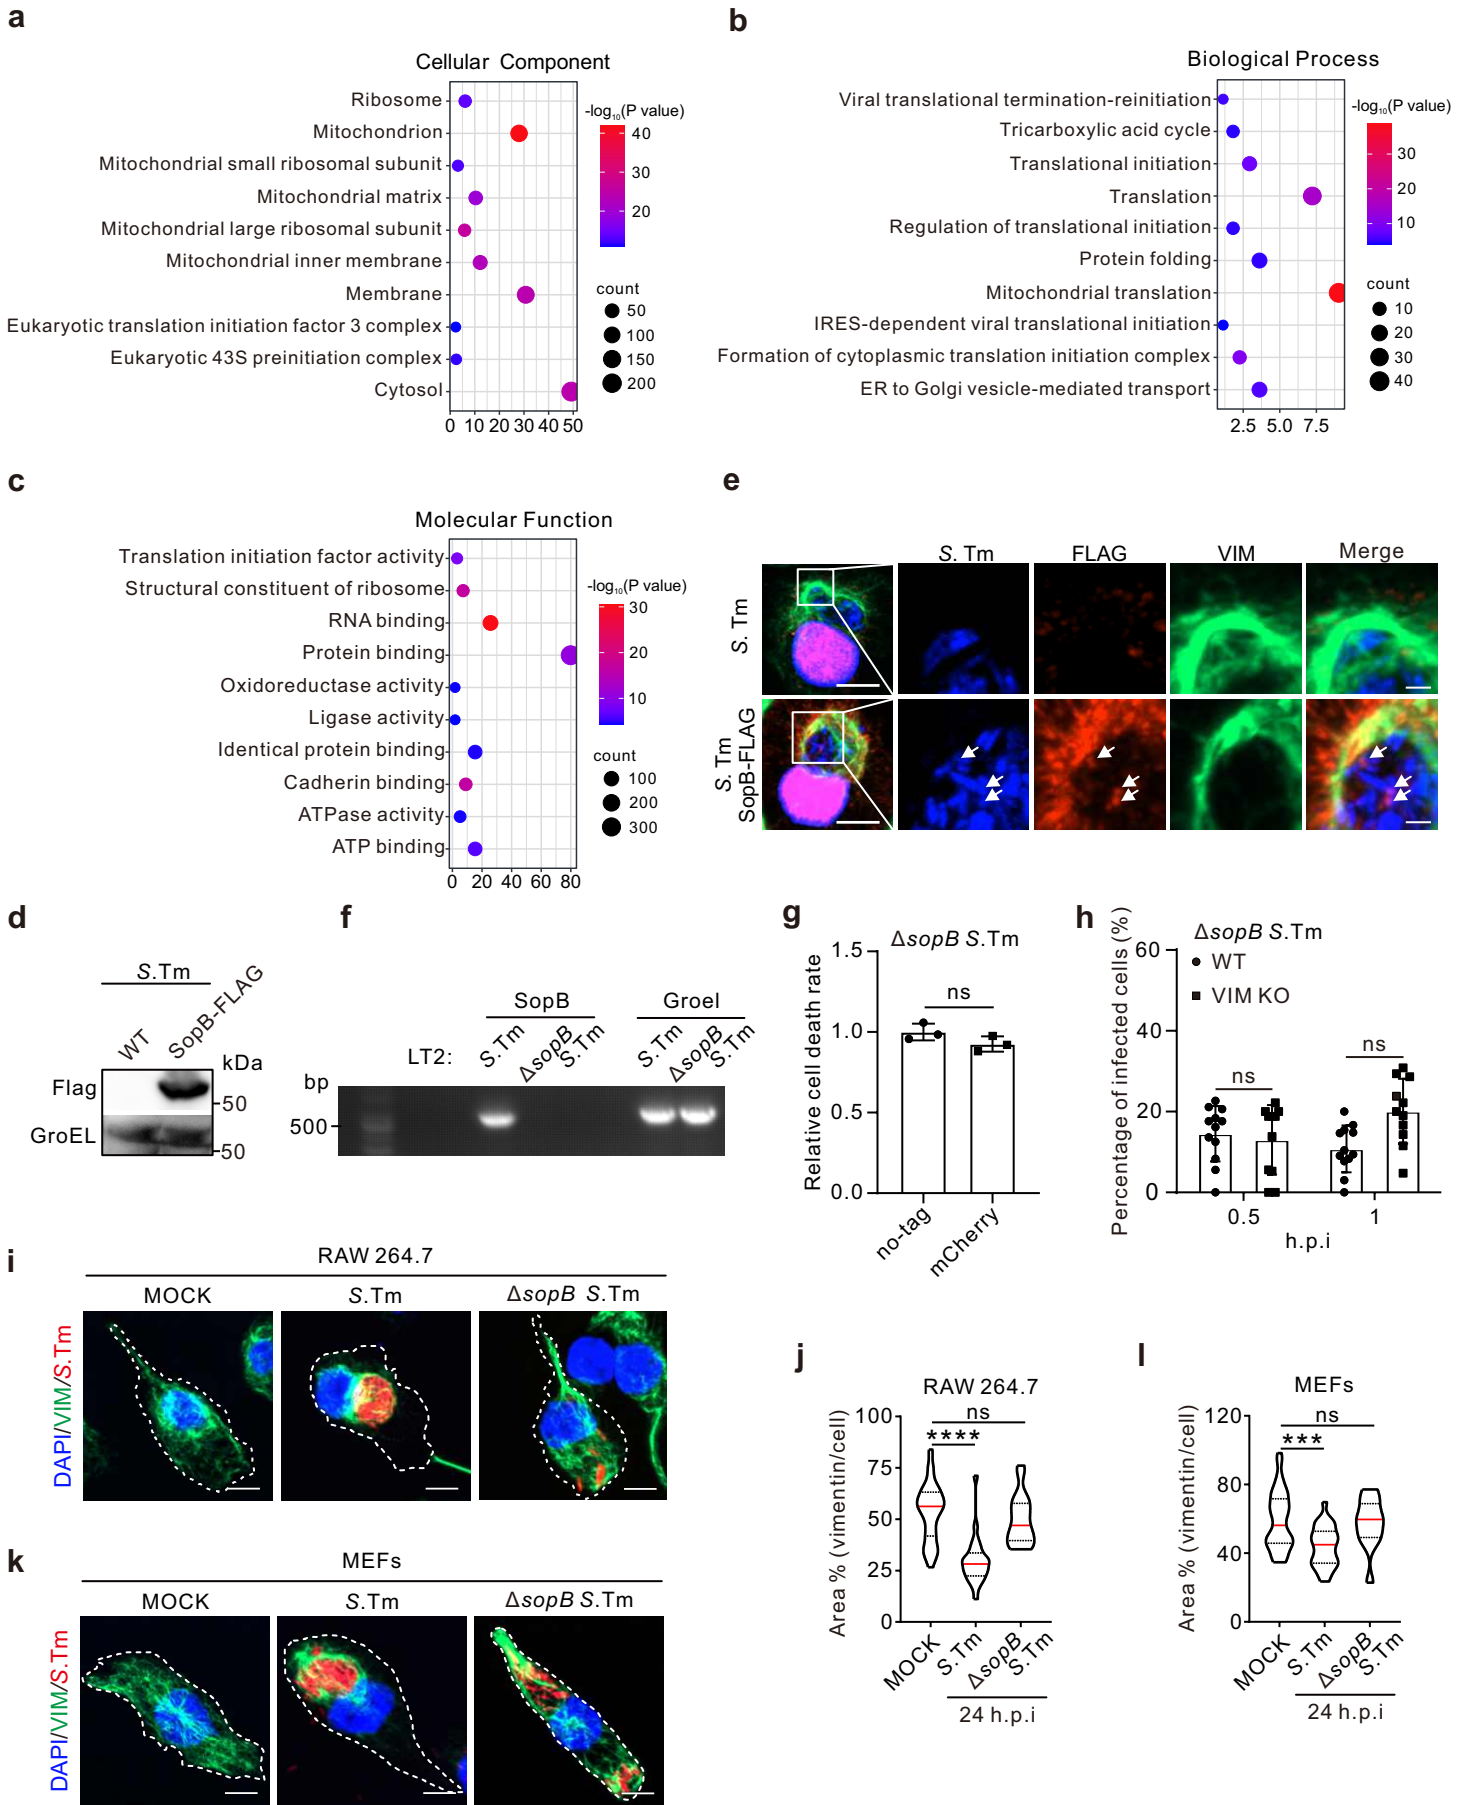

**Supplementary Figure 2. *Salmonella* infection induced variation of vimentin interacting components from host cells, and SopB is critical for vimentin rearrangement in different cell lines.**

**a-c**, GO analysis of all identified eukaryotic proteins co-immunoprecipitated with vimentin by mass spectrometry. Top 10 significant enrichments of cellular component (**a**), biologic process (**b**) and molecular function (**c**) were shown in the bubble chart, respectively. **d**, Western blotting analysis to detect the FLAG-tagged SopB in *S. Tm*. GroEL serves as a loading control. **e**, Immunofluorescence images of cells infected with non-tagged *S. Tm* or SopB-FLAG *S. Tm* (MOI=10) at 24 *hpi*. White arrows indicate SopB signals within bacteria. Scale bars, 10  $\mu\text{m}$  in the cell images and 3  $\mu\text{m}$  in the magnified images. **f**, Agarose gels analysis to detect the PCR products amplifying *sopB* from genomic DNA of *S. Tm* or  $\Delta\text{sopB}$  *S. Tm*. **g**, Quantification of the normalized cell death rate in cells infected with the non-tagged or mCherry-tagged  $\Delta\text{sopB}$  *S. Tm* (MOI=10) at 24 *hpi*, from three independent experiments. **h**, Percentage of cells in WT and VIM KO background infected with the  $\Delta\text{sopB}$  *S. Tm* (MOI=10) at 0.5 and 1 *hpi*, respectively, from three independent experiments. **i**, Immunofluorescence images of RAW 264.7 infected with *S. Tm* or  $\Delta\text{sopB}$  *S. Tm* (MOI=10) at 24 *hpi*. Scale bars, 10  $\mu\text{m}$ . **j**, Quantification of the relative vimentin area versus cell area in (**i**) was measured. **k**, Immunofluorescence images of MEFs infected with *S. Tm* or  $\Delta\text{sopB}$  *S. Tm* (MOI=10) at 24 *hpi*. Scale bars, 10  $\mu\text{m}$ . **l**, Quantification of the relative vimentin area versus cell area in (**k**) was measured. n=20 views (60 $\times$ /1.5 oil objective) from three independent experiments in (**j**, **l**). White dash lines in (**i**, **k**) indicate the outline of the cells. Assays were conducted three times independently with similar results (**d-f**). Data are represented as mean  $\pm$  SD. Statistics (ns,  $p > 0.05$ ; \*\*\* $p < 0.001$ ; \*\*\*\* $p < 0.0001$ ): unpaired two-tailed Student's *t*-test (**g-h**), one-way ANOVA with Dunnett's analysis (**j**, **l**), or EASE score (**a-c**). Source data are provided as a Source Data file.

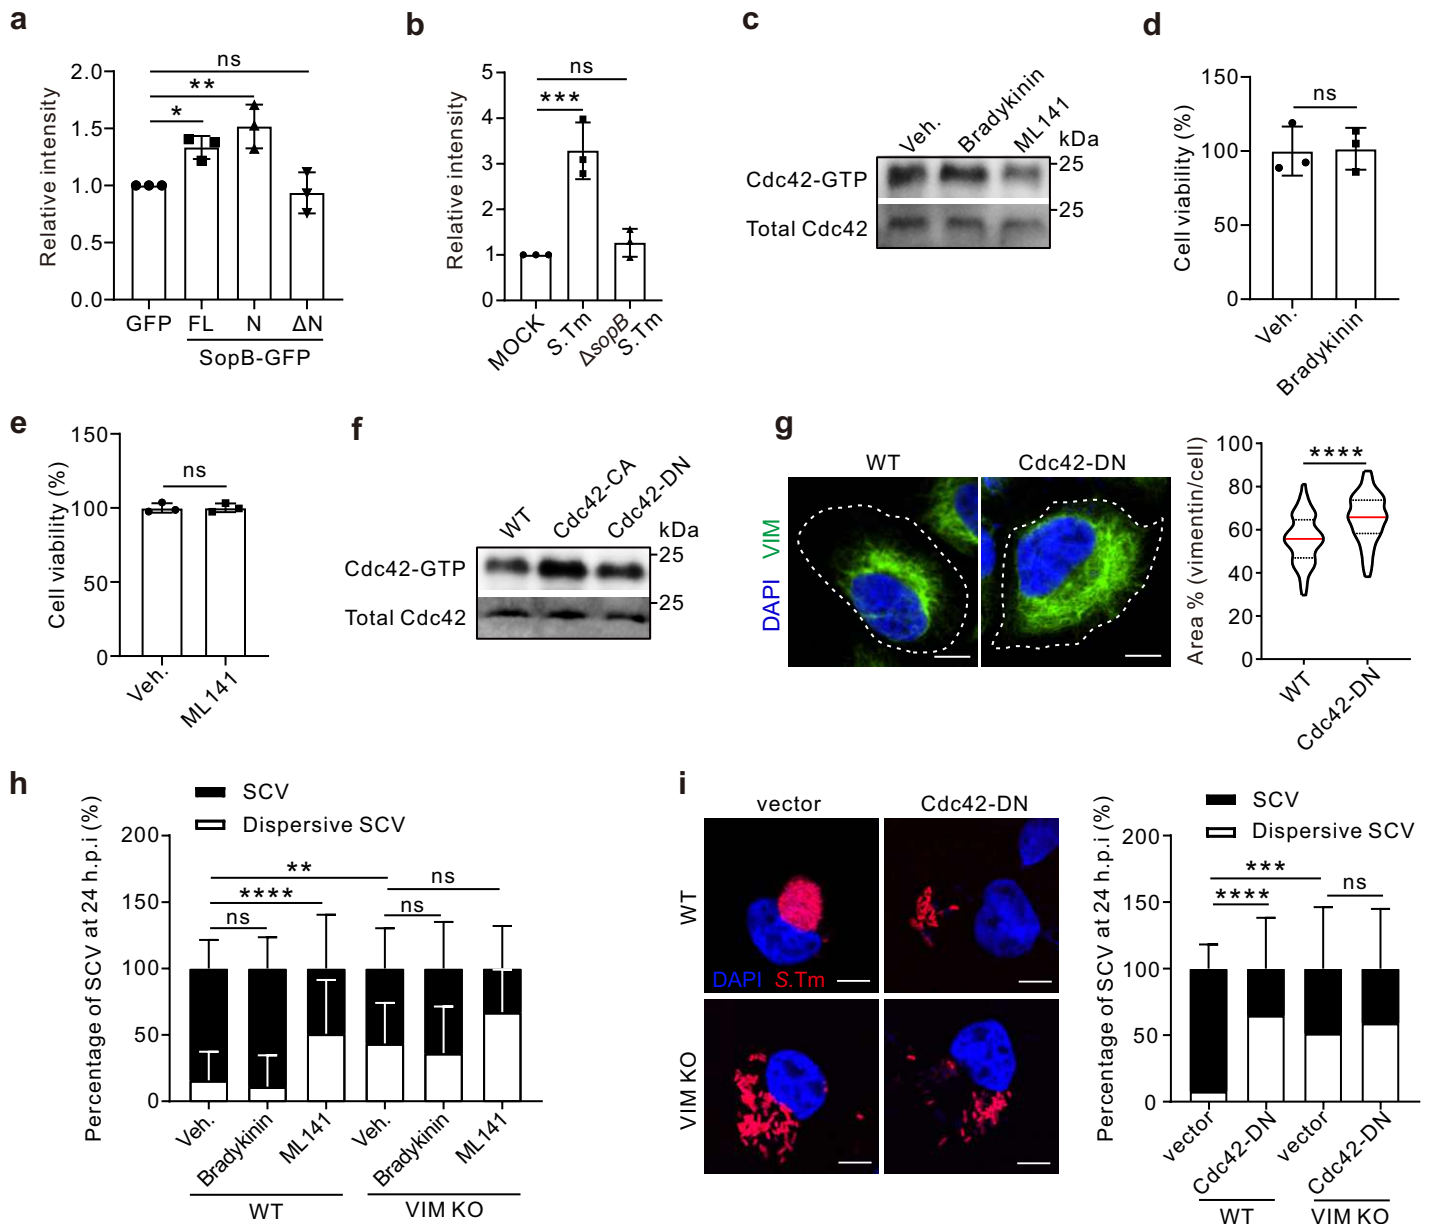

**Supplementary Figure 3. Cdc42 is essential for vimentin rearrangement and SCV maintenance.** **a**, Quantification of Cdc42-GTP relative to total Cdc42 upon SopB constructs transfection corresponding to Fig. 3f, from three independent experiments. **b**, Quantification of Cdc42-GTP relative to total Cdc42 upon infection with WT and  $\Delta$ sopB S. Tm (MOI=10) corresponding to Fig. 3g, from three independent experiments. **c**, Western blotting analysis to detect the GTP-bound active level of Cdc42 upon treatment with its activator bradykinin (100 ng/ml) and inhibitor ML141 (5  $\mu$ M), respectively. **d**, **e**, Quantification of the cell viability treated with Bradykinin (**d**) and ML141 (**e**) for 24 h was measured respectively. **f**, Western blotting analysis to detect the GTP-bound active level of Cdc42 in WT, constitutively active Cdc42 (Cdc42-CA) and dominant negative Cdc42 (Cdc42-DN) cells, respectively, from three independent experiments. **g**, Immunofluorescence images of WT and Cdc42-DN stably expressed cells. White dash lines indicate the outline of the cells. Scale bars, 10  $\mu$ m. Right panel shows the quantification of the relative vimentin area versus cell area. **h**, Quantification of the percentage of SCV versus dispersive SCV corresponding to Fig. 3j. **i**, Immunofluorescence images of WT and Cdc42-DN stably expressed WT and VIM KO cells infected with the S. Tm (MOI=10) at 24 hpi. Scale bars, 10  $\mu$ m. Right panel shows the quantification of the percentage of SCV versus dispersive SCV. n=20 views (60 $\times$ /1.5 oil objective) from three independent experiments in (**g**-**i**). Assays were conducted three times independently with similar results (**c**, **f**). Data are represented as mean  $\pm$  SD. Statistics (ns,  $p > 0.05$ ; \* $p < 0.05$ ; \*\* $p < 0.01$ ; \*\*\* $p < 0.001$ ; \*\*\*\* $p < 0.0001$ ): unpaired two-tailed Student's *t*-test (**d**, **e**, **g** right panel); one-way ANOVA with Dunnett's analysis (**a**, **b**) or two-way ANOVA with Sidak's analysis (**h**, **i** right panel). Source data are provided as a Source Data file.

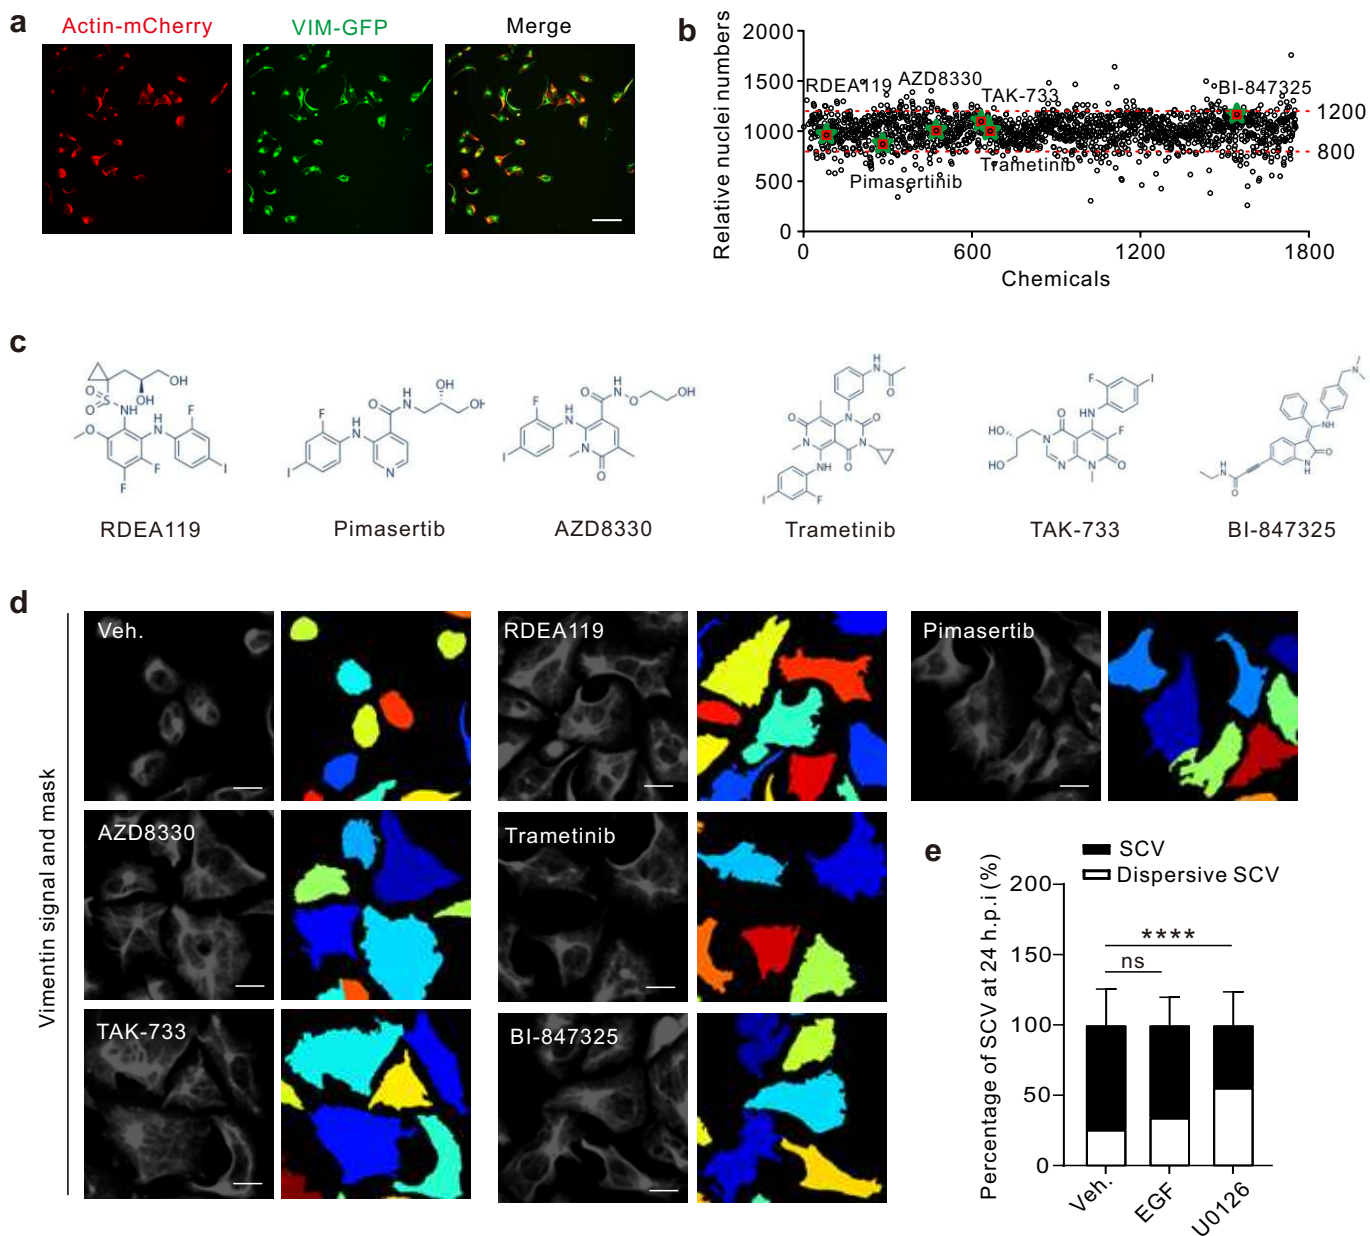

**Supplementary Figure 4. Candidate chemicals from high-content screens showed no obvious cell cytotoxicity.** **a**, Immunofluorescence images of VIM-GFP and Actin-mCherry stably expressing cell line. Scale bars, 100  $\mu$ m. **b**, Quantification of the relative nuclei numbers of chemically treated cells. The top six candidates in MEK1/2 pathway are highlighted as the green star. **c**, The chemical structures of the top six MEK1/2 inhibitors from the screen. **d**, Representative images of vimentin treated with the top six MEK1/2 inhibitors, respectively. Scale bars, 20  $\mu$ m. **e**, Quantification of the percentage of SCV versus dispersive SCV corresponding to Fig. 4g.  $n=20$  views (60 $\times$ /1.5 oil objective) from three independent experiments. Assays were conducted three times independently with similar results (**a**, **d**). Data are represented as mean  $\pm$  SD. Statistics (ns,  $p > 0.05$ ; \*\*\*\* $p < 0.0001$ ): two-way ANOVA with Sidak's analysis (**e**). Source data are provided as a Source Data file.

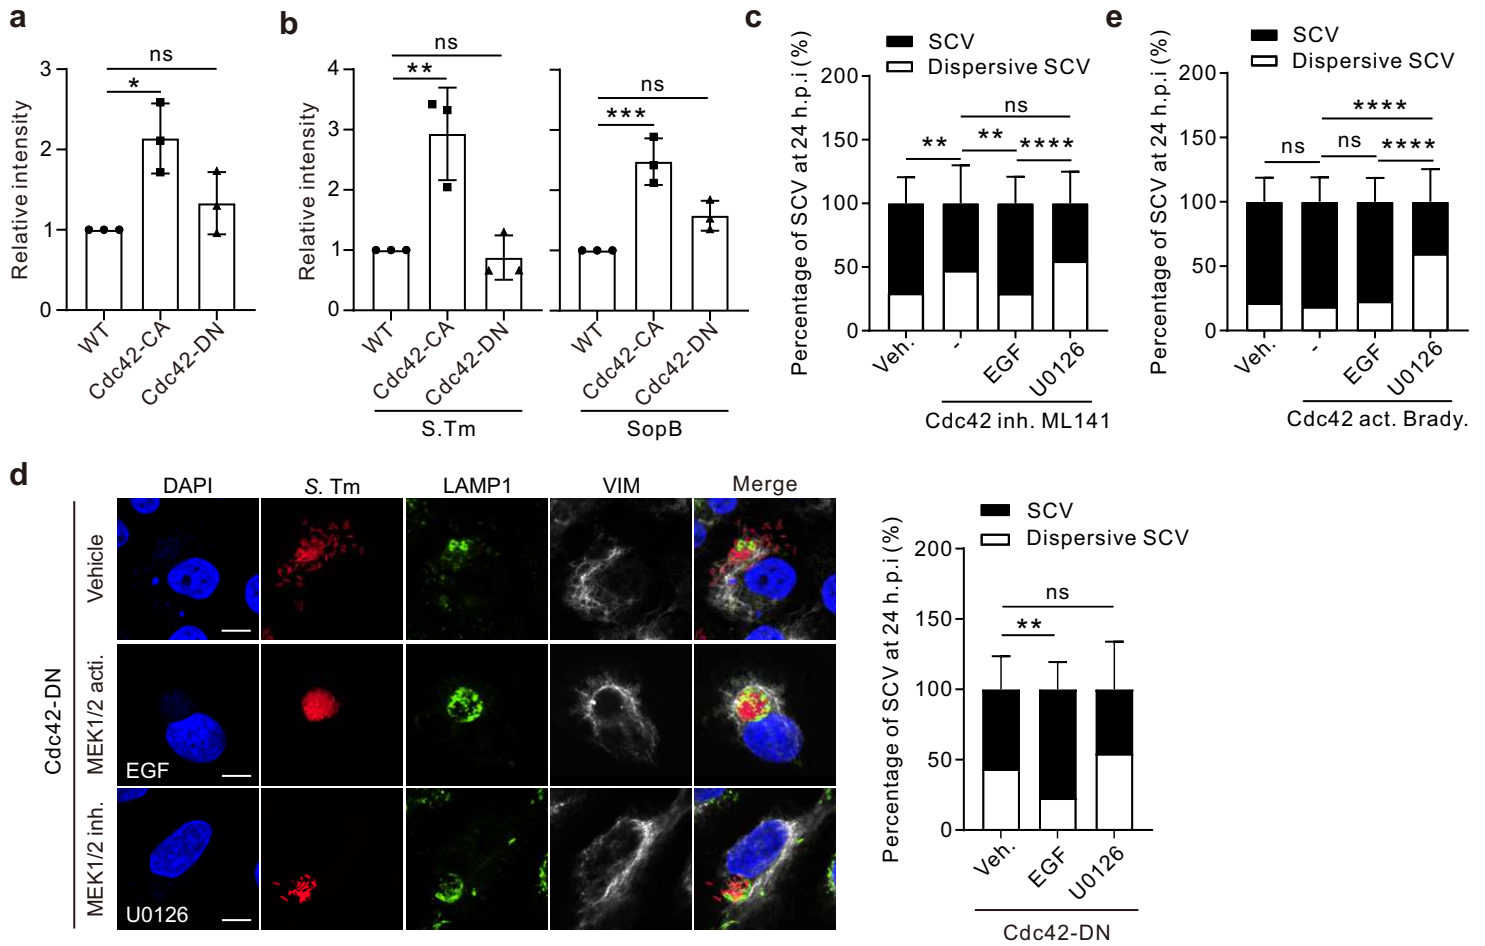

**Supplementary Figure 5. Verification of MEK1/2-Cdc42 regulation.** **a,b**, Quantification of p-MEK1/2 relative to total MEK1/2 corresponding to Fig. 5a and 5c, respectively, from three independent experiments. **c**, Quantification of the percentage of SCV versus dispersive SCV corresponding to Fig. 5i. **d**, Immunofluorescence images of Cdc42-DN stably expressed cells infected with *S. Tm* (MOI=10) at 24 *hpi* with or without treatment of MEK1/2 activator EGF (100 ng/ml) or inhibitor U0126 (10  $\mu$ M), respectively. Scale bars, 10  $\mu$ m. Quantification of the percentage of SCV versus dispersive SCV is shown in the right panel. **e**, Quantification of the percentage of SCV versus dispersive SCV corresponding to Fig. 5j.  $n=20$  views (60 $\times$ /1.5 oil objective) from three independent experiments in (**c-e**). Data are representative as mean  $\pm$  SD. Statistics (ns,  $p > 0.05$ ; \* $p < 0.05$ ; \*\* $p < 0.01$ ; \*\*\* $p < 0.001$ ; \*\*\*\* $p < 0.0001$ ): one-way ANOVA with Dunnett's analysis (**a, b**) or two-way ANOVA with Sidak's analysis (**c-e**). Source data are provided as a Source Data file.

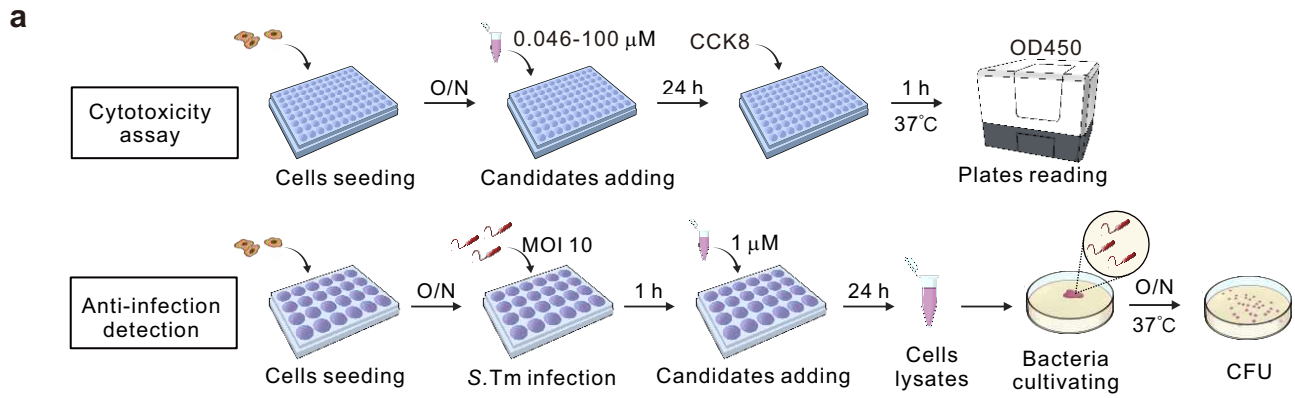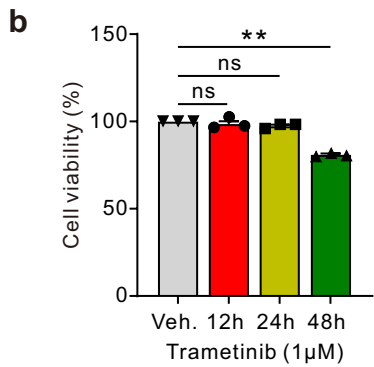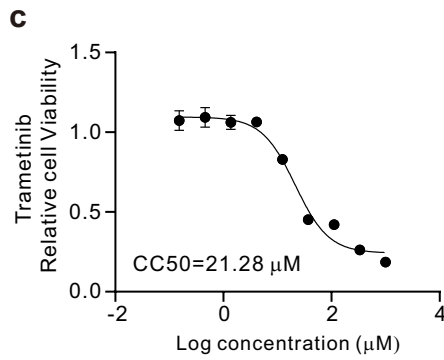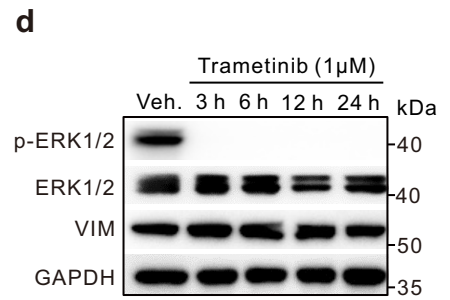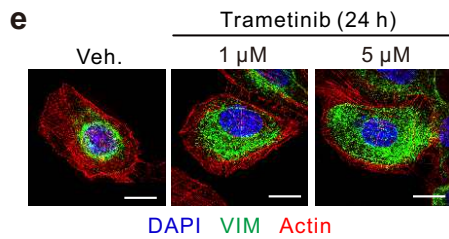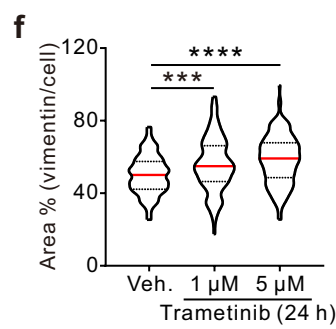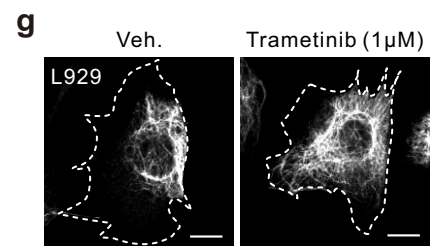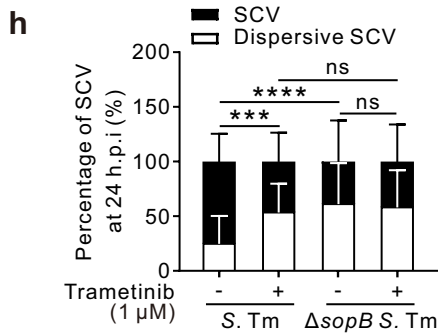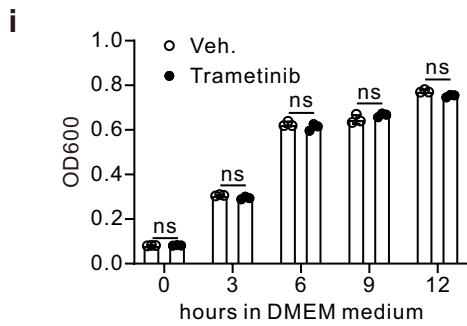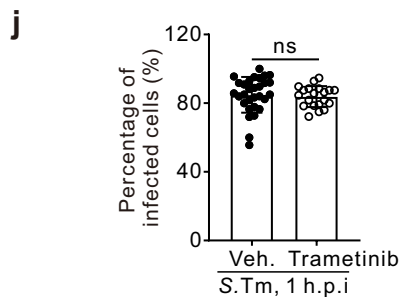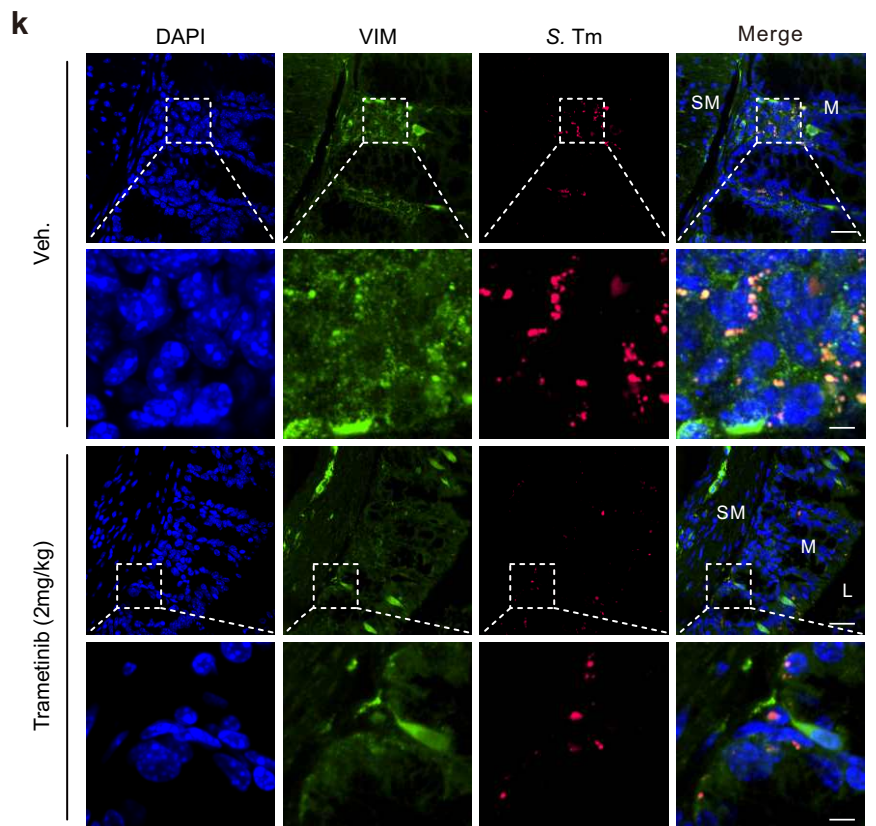



**Supplementary Figure S6. Verification of Trametinib effects.** **a**, Schematic diagram of the secondary screen with cytotoxicity and anti-infection detection as a readout for the top six MEK1/2 inhibitors from the primary imaging-based screen. **b**, Quantification of the cell viability of cells that treated with Trametinib (1 $\mu$ M) for different time points, from three independent experiments. **c**, Quantification of the relative cell viability in increasing concentrations of Trametinib indicating the CC50 from three independent experiments. **d**, Western blotting verified the effects of Trametinib on the inhibition of MEK1/2 activity. GAPDH serves as a loading control. Assays were conducted three times independently with similar results. **e**, Immunofluorescence images of vimentin in cells treated with 1  $\mu$ M and 5  $\mu$ M Trametinib for 24 h, respectively. Scale bars, 10  $\mu$ m. **f**, Quantification of the relative vimentin area versus cell area in (e) was measured. n=30 views (60 $\times$ /1.5 oil objective) from three independent experiments. **g**, Immunofluorescence images of L929 cells treated without or with Trametinib (1 $\mu$ M) for 24h. Scale bars, 10  $\mu$ m. **h**, Quantification of the percentage of SCV versus dispersive SCV corresponding to Fig. 6d. n=20 views (60 $\times$ /1.5 oil objective) from three independent experiments. **i**, Growth rates of *S. Tm* or Trametinib-treated *S. Tm* were quantified by OD600 measurement at 0, 3, 6, 9, 12 *hpi*, from three independent experiments. **j**, Percentage of *S. Tm* or Trametinib-treated *S. Tm* (MOI=10) infected cells was analyzed at 24*hpi*. n=20 views (60 $\times$ /1.5 oil objective) from three independent experiments. **k**, Immunofluorescence staining of vimentin in the colon tissue slices of infected mice treated with or without Trametinib (2mg/kg). Scale bars, 30  $\mu$ m in the upper images and 10  $\mu$ m in the magnified images. Mucosal (M); submucosal (SM); lumen (L) (n=5 mice). Data are representative as mean  $\pm$  SD. Statistics (ns,  $p > 0.05$ ; \*\* $p < 0.01$ ; \*\*\* $p < 0.001$ ; \*\*\*\* $p < 0.0001$ ): unpaired two-tailed Student's *t*-test (**j**), one-way ANOVA with Dunnett's analysis (**b**, **f**) or two-way ANOVA with Sidak's analysis (**h**, **i**). Source data are provided as a Source Data file.

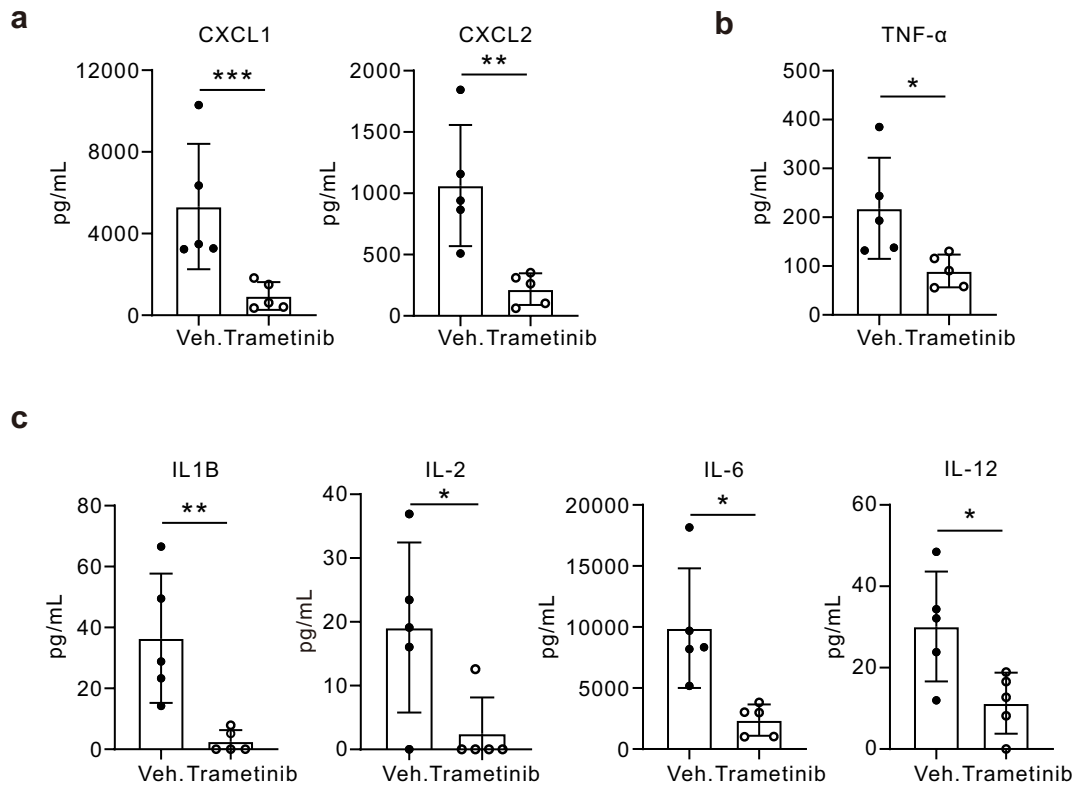

**Supplementary Figure 7. The *Salmonella*-induced inflammatory response in mice infected model.** a-c, Chemokines (CXCL1; CXCL2) (a), Tumor necrosis factor (TNF $\alpha$ ) (b), and Interleukins (IL1B; IL-2; IL-6; IL-12) (c) from *S. Tm* infected mice model treated with or without Trametinib (2 mg/kg) (n=5). Data are representative as mean  $\pm$  SD. Statistics (\* $p$  < 0.05; \*\* $p$  < 0.01; \*\*\* $p$  < 0.001): unpaired two-tailed Student's t-test (a-c). Source data are provided as a Source Data file.
