# Supplementary material
Source: PubMed Central journal article supplement (PMC9886915)
Supplement: 41467_2023_36123_MOESM2_ESM.pdf [file 41467_2023_36123_MOESM2_ESM.pdf]

## **Description of Additional Supplementary Files**

File Name: Supplementary Movie 1

Description: Time-lapse movie of vimentin-GFP expressing cells infected with the mCherry tagged *S. Tm*. The recording time interval is 0.6 h / frame. The display rate is 3 frames / second. Scale bar, 20  $\mu\text{m}$ .
